# Supplementary material
Source: PubMed Central journal article supplement (PMC7783327)
Supplement: AEM.01964-20-s0001.pdf [file AEM.01964-20-s0001.pdf]

## Supplemental Tables and Figures

**Supplemental Table S1** The presence of *napAB*, *nrfAH/nirBD*, *nirK*, *norBC* and *nosZ* orthologs in sequenced *Shewanella* genomes

| Strains                                | Genes                                                                |                                                  |             |                        |             |
|----------------------------------------|----------------------------------------------------------------------|--------------------------------------------------|-------------|------------------------|-------------|
|                                        | <i>napAB</i>                                                         | <i>nrfAH/nirBD</i>                               | <i>nirK</i> | <i>norBC</i>           | <i>nosZ</i> |
| <i>S. oneidensis</i>                   | SO_0845<br>SO_0848                                                   | SO_3980                                          |             |                        |             |
| <i>S. denitrificans</i>                | Sden_1497<br>Sden_1498                                               | Sden_3715<br>Sden_3716                           | Sden_3482   | Sden_1980<br>Sden_1981 | Sden_2219   |
| <i>S. frigidimarina</i>                | Sfri_0552<br>Sfri_0553<br>Sfri_2552<br>Sfri_2553                     | Sfri_0622<br>Sfri_3036<br>Sfri_1509<br>Sfri_1510 |             | Sfri_3253              |             |
| <i>S. amazonensis</i>                  | Sama_1622<br>Sama_1623<br>Sama_2983<br>Sama_2986                     | Sama_0648                                        | Sama_2681   | Sama_0728              |             |
| <i>S. baltica OS155</i>                | Sball175_0854<br>Sball175_0855<br>Sball175_2442<br>Sball175_2443     | Sball175_3632                                    |             |                        |             |
| <i>S. loihica</i>                      | Shew_1770<br>Shew_1771<br>Shew_3206<br>Shew_3209                     | Shew_0505<br>Shew_0844                           | Shew_3335   | Shew_0657              | Shew_3400   |
| <i>S. putrefaciens</i><br><i>CN-32</i> | Sputcn32_1903<br>Sputcn32_1904<br>Sputcn32_3148<br>Sputcn32_3151     | Sputcn32_0685<br>Sputcn32_3604                   |             | Sputcn32_3072          |             |
| <i>S. putrefaciens 200</i>             | Sput200_2087<br>Sput200_2088<br>Sput200_3259<br>Sput200_3262         | Sput200_0617<br>Sput200_2562<br>Sput200_3617     |             | Sput200_3181           |             |
| <i>S. sp. ANA-3</i>                    | Shewana3_1900<br>Shewana3_1901<br>Shewana3_3430<br>Shewana3_3433     | Shewana3_0658<br>Shewana3_2363                   |             | Shewana3_0846          |             |
| <i>S. sp. W3-18-1</i>                  | Sputw3181_0792<br>Sputw3181_0795<br>Sputw3181_2104<br>Sputw3181_2105 | Sputw3181_3486<br>Sputw3181_3743                 |             | Sputw3181_0873         |             |

**Table S2.** CRP/FNR homologues in *Shewanella loihica* PV-4, *Escherichia coli* K-12, *Shewanella oneidensis* MR-1, *Shewanella* sp. W3-18-1, *Shewanella denitrificans*, *Shewanella amazonensis*, *Marinobacter psychrophilus*, *Marinobacter* sp. BSs20148, *Pseudomonas* sp. CCOS 191 and *Pseudomonas aeruginosa* LESB58

|                                      | <i>crp1</i>    | <i>crp2</i>      | <i>crp3</i>      | <i>crp4</i> | <i>nirK/nirS</i> |
|--------------------------------------|----------------|------------------|------------------|-------------|------------------|
| <i>Shewanella loihica</i> PV-4       | Shew_0585      | Shew_3331        | Shew_1993        | Shew_3233   | Shew_3335        |
| <i>Shewanella oneidensis</i> MR-1    | SO_0624        | -                | SO_2356          | -           | -                |
| <i>Shewanella</i> sp. W3-18-1        | Sputw3181_3522 | -                | Sputw3181_2054   | -           | -                |
| <i>Escherichia coli</i> K-12         | b3357          | -                | b1334            | -           | -                |
| <i>Pseudomonas aeruginosa</i> LESB58 | PLES_06311     | PLES_0524<br>1   | PLES_3784<br>1   | -           | PLES_05161       |
| <i>Pseudomonas</i> sp. CCOS 191      | CCOS191_4899   | CCOS191_4<br>267 | CCOS191_3<br>685 | -           | CCOS191_0<br>291 |
| <i>Marinobacter</i> sp. BSs20148     | MRBBS_3547     | MRBBS_31<br>32   | MRBBS_08<br>30   | -           | MRBBS_101<br>3   |
| <i>Marinobacter psychrophilus</i>    | ABA45_16645    | ABA45_148<br>55  | ABA45_043<br>40  | -           | ABA45_0524<br>5  |
| <i>Shewanella denitrificans</i>      | Sden_3190      | Sden_3444        | Sden_1843        | -           | Sden_3482        |
| <i>Shewanella amazonensis</i>        | Sama_3004      | Sama_2685        | Sama_1799        | -           | Sama_2681        |

**a**

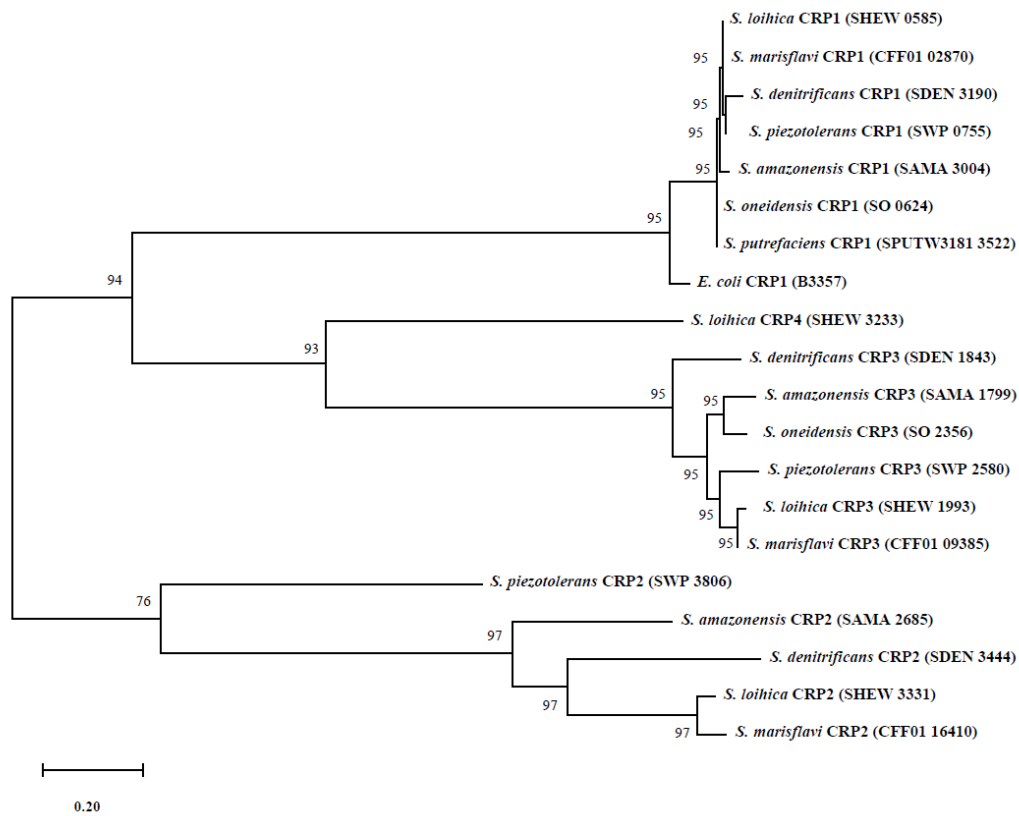

**b**

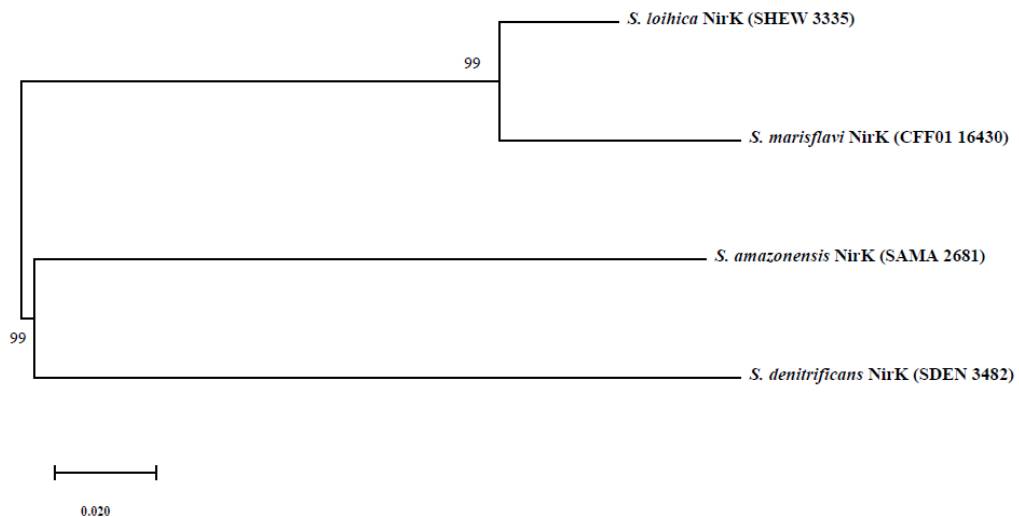

**Supplemental Figure S1** (a), Distance tree of CRP paralogues in different *Shewanella* species based on protein sequences similarity. *E. coli* CRP1 used as reference. (b), Distance tree of NirK in different *Shewanella* species based on protein sequences similarity. Bootstrap values (expressed as percentages of 1000 replications)  $\geq 50\%$  are shown at branch points.

A. *nrfA*

MR-1 AACCTGTGAAACAACAACCTATTAC-ATTTTGATCTAGCGCAAACTTCGT-TTCAGATACCCCTAAGAGGTA: : : 23: : : TAACTT  
SB2B AAATGTGAAACAACAACCTATTAC-ATTTTGATCTAGCGCAAACTTCAA-CCCAGATACCCCTAAGAGGTA: : : 23: : : TAACTT  
SMAV AAATGTGAAACAACAACCTATTAC-ACTATTGATCTGCCATCAAATTTTAC-CCCAGATACCCCTAAGAGGTA: : : 23: : : TAACTT  
PV-4 AAATGTGAAACAACAACCTATTAC-ATTATTGATCTGCCATCAAATTTTGA-CCCAGATACCCCTAAGAGGTA: : : 23: : : TAACTT

B. *napD*

MR-1 AACCTGAGA GTTAGATCACGCCAAAACCTTTGATCCCGATCGACTATCCC-CTTCAATACCTCTTGTGAGGTA: : : 22: : : TAGACT  
SB2B AACCTGAGAAGCAGATCAGGCTCAAAAACATGATCTCTGTCTACAAACCT-CTCTGATACCTCTTAGTGGGTA: : : 22: : : TAGACT  
SMAV AACCTGAGA GTTAGCTCAACGAAAAACTTTGATCTCGATCTACAAAAGC-GCCAGTACCCCTCAAGAGGTA: : : 22: : : TAGACT  
PV-4 AACCTGAGAAGGAGCTCACACGAAAAACTTTGATCTCGATCTACAAAAGC-TCCAGTACCTCTCAAGAGGTA: : : 22: : : TAGACT

C. *cymA*

MR-1 AAATGTCGCTTTGATCACATTTTGTATTCTAAAAATGATTTTCATTGCCTTAGCTACTTAAGGTGGTACTT-----TATAAA  
SB2B GATATTGATTTTACACCAAAACCCGAGCTATCAGTGCCTGTTGACATGATGACCAGCAAGGGGCATGAC-----TATAAA  
SMAV GAGTTAGAGCTAGCTCTCATTTTACGGTTTTAAAGCCAGATCAATAGCCTTCTTCTGGTTATACTCTCAGC-----TATAAT  
PV-4 TATTTATCAGCAATTTCAATAAAACTTTGCTTAGGTAAAGATAGAGTTAGAGCTAGCTCTCATTTTACGGTTTT-----TATAAT

D. *nirK*

SB2B GACGTTAACGGAAAGTTTTTTTCGCCAGTTGACTTCCATCAAATGCTTTTTTGCCCATGGC-----GATAAT  
PV-4 TTAGCCAATTTGAAATTTCTTGAGCGACTTGACCAAAGTCAAATTTCAATCTGCGTCAAAGG-----CATAGT  
SMAV TTTGCTCATTTGCACATTTTTTTAGCGACTTGACCAAAGTCAAATTTCAATCTGCGTCAAAGG-----CATAGT  
Sden AAGCTTTTGCTAATTGACTCCCACCACCTGATCTAGGTCAAATTTGATTTTCATAACCC-----TGTATG

E. *napE*

MR-1 TGATCTAACTAAATCTATCGCCAAATGATGATCTGGATCAAACATCCA-AGGGTTACCGATTTGAGGTA: : : 24: : : TATGAT  
SB2B TGACCCCTAAAAATACATAGAAATAGATGATCTGGATCAAACGGGCAA-TCTTTTACCGATTTAGGGTA: : : 24: : : TATGAT  
SMAV TGATCTGGGTTTTATCTGCGACAAAAGGATGATCCAGATCAAACCTGCATAGAATTACCGATTTAGGGTA: : : 24: : : TACCAT  
PV-4 TGATCCGGGTTTTATCTGCTTCAAAGGATGATCCAGATCAAACCTGCATAGAATTACCGATTTAGGGTA: : : 24: : : TACCAT

aaaTGTGAtctagaTCACA ttt TTTGAT... ATCAA TACYYMTWWAKRRGTA TATAAT  
CRP FNR NarP -10

**Supplemental Figure S2.** Multiple sequence alignment of the 5'-upstream regions of *nap-alpha*, *nirK*, *nap beta*, *cymA* and *nrfA* genes. Sequence motifs recognized by CRP1, FNR and NarP are indicated below the alignment, with the most conserved sequences indicated in capital letters and others in small letters. Y, C or T; M, A or C; K, G or T; W, A or T; and R, G or A. The motifs in the upstream regions are shaded; in white for the capital letters and in black for the small letters. MR1, *Shewanella oneidensis*; SB2B, *Shewanella amazonensis*; SMAV, *Shewanella marisflavi*; PV4, *Shewanella loihica*. (1)

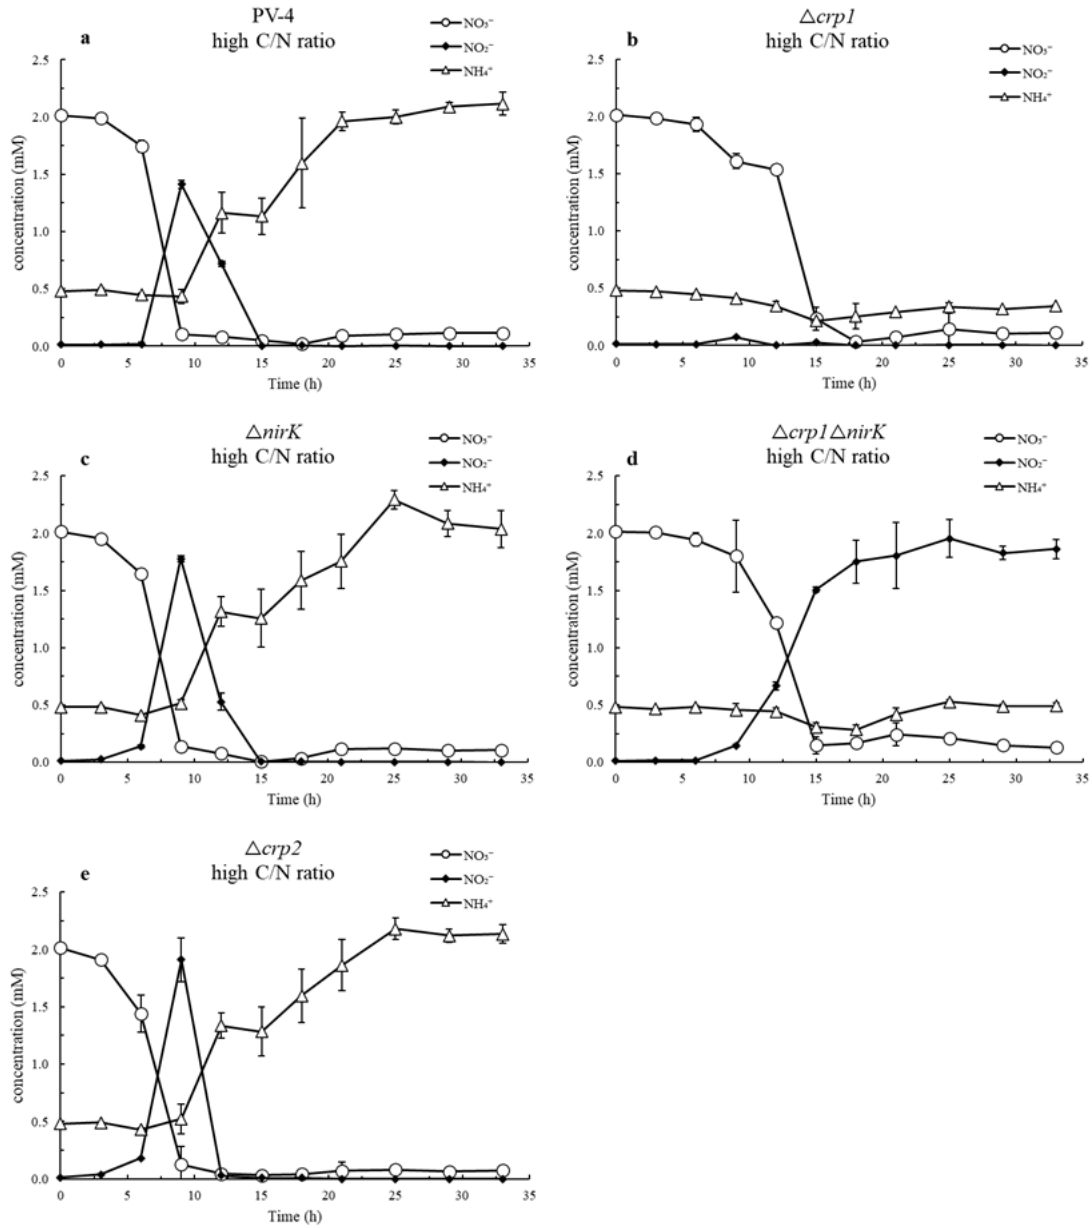

**Supplemental Figure S3.** The nitrate reduction of wild type strain of *S. loihica* PV-4 (a), in-frame deletion mutants  $\Delta crp1$  (b),  $\Delta nirK$  (c),  $\Delta crp1\Delta nirK$  double mutant (d) and in-frame deletion mutants  $\Delta crp2$  (e) under high carbon/nitrogen ratios. The concentration of  $\text{NO}_3^-$ ,  $\text{NO}_2^-$ ,  $\text{NH}_4^+$  in the medium was measured under high carbon/nitrogen ratio (C/N=12), respectively. Lactate (10 mM) and nitrate (2 mM) were added to phosphate-buffered basal salt medium supplemented with 0.5 mM of ammonium chloride as nitrogen source. Results are the mean of three replicates and error bars indicates standard deviation.

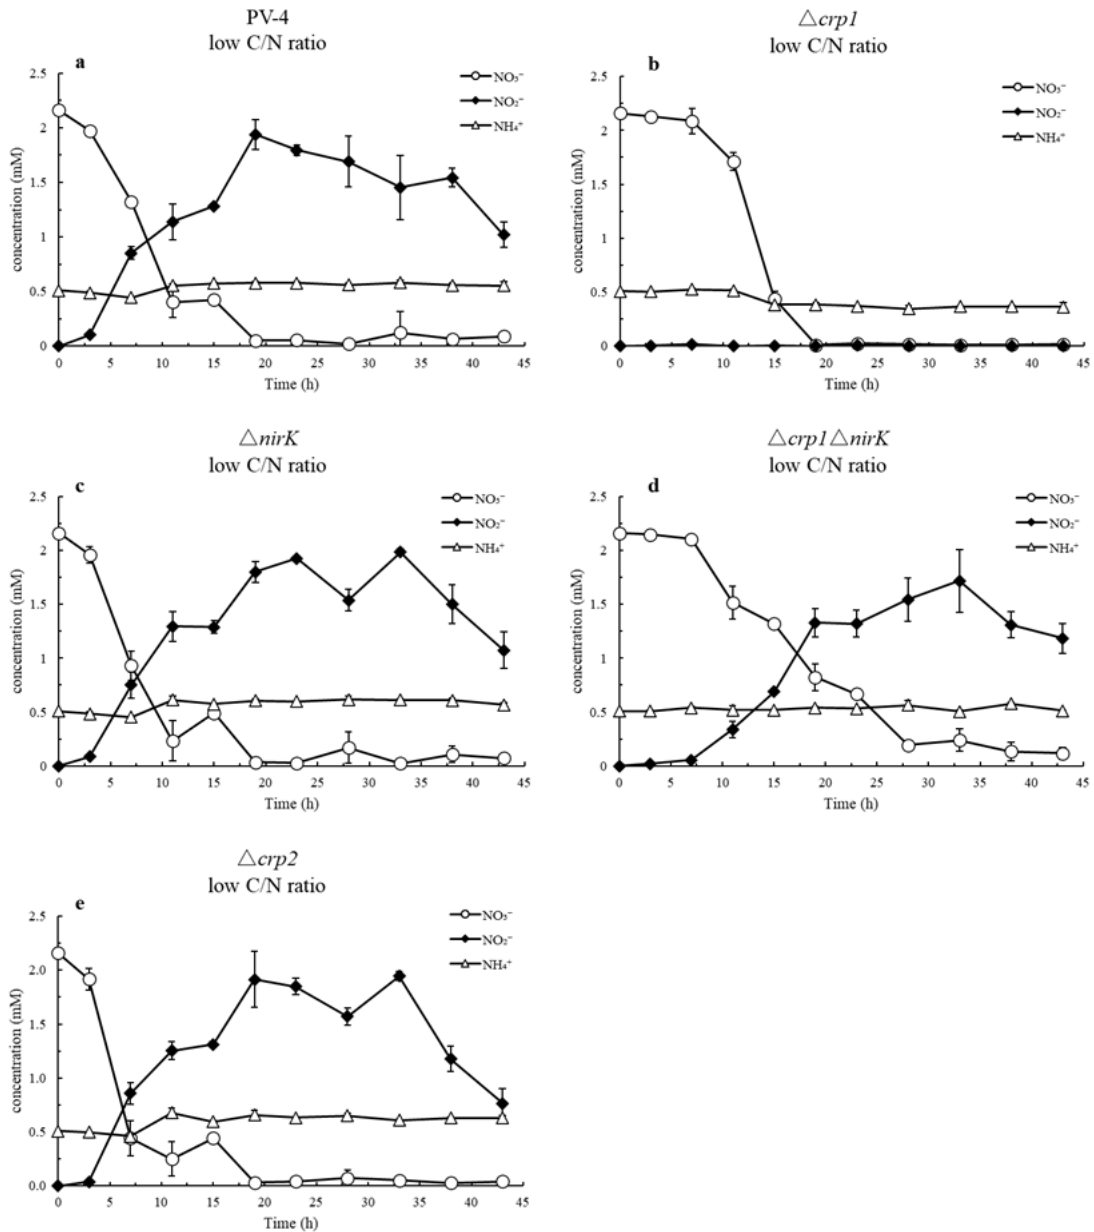

**Supplemental Figure S4.** The nitrate reduction of wild type strain of *S. loihica* PV-4 (a), in-frame deletion mutants  $\Delta crp1$  (b),  $\Delta nirK$  (c),  $\Delta crp1 \Delta nirK$  double mutant (d) and in-frame deletion mutants  $\Delta crp2$  (e) under low carbon/nitrogen ratios. The concentration of  $\text{NO}_3^-$ ,  $\text{NO}_2^-$ ,  $\text{NH}_4^+$  in the medium was measured under low carbon/nitrogen ratio (C/N=2), respectively. Lactate (1.66 mM) and nitrate (2 mM) were added to phosphate-buffered basal salt medium supplemented with 0.5 mM of ammonium chloride as nitrogen source. Results are the mean of three replicates and error bars indicates standard deviation.

**a**

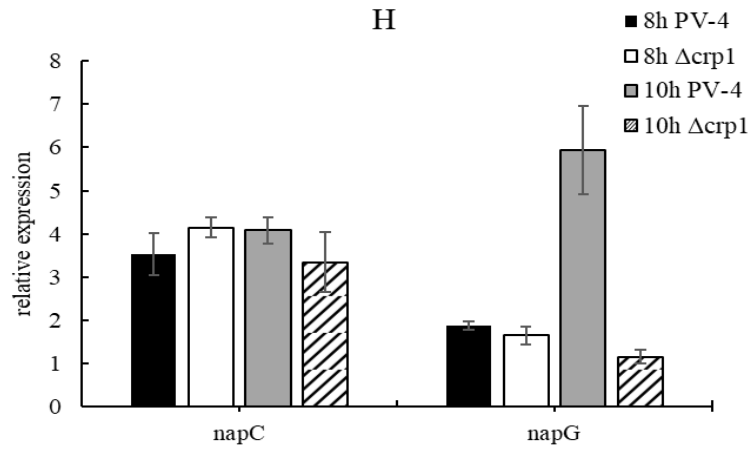

**b**

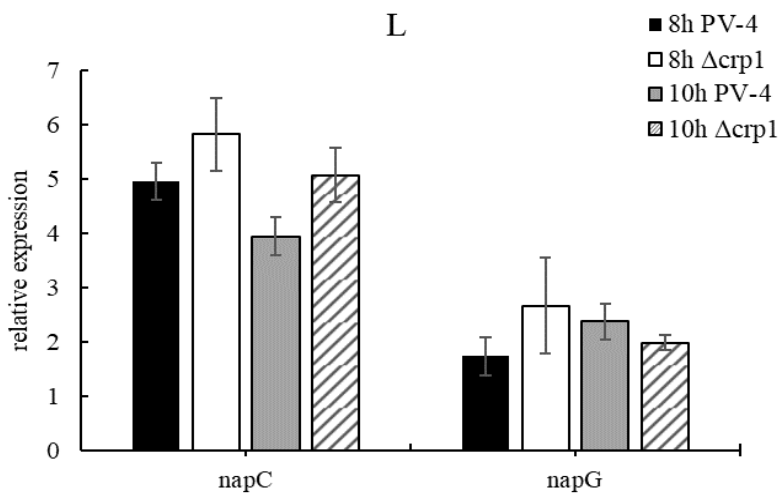

**Supplemental Figure S5.** The quantitative PCR analyses on transcriptional profile of nitrate reduction genes *napC* (CRP-independent *nap-alpha* gene cluster) and *napG* (CRP1-dependent *nap-beta* gene cluster) in the wild type strain *S. loihica* PV-4 and in-frame deletion mutant  $\Delta crp1$  under high carbon/nitrogen ratios (a) and low carbon/nitrogen ratios (b) at 8 and 10 hours after anaerobic cultivation. H represents C/N=55, L represents C/N=4. Gene expression was normalized against the 16S rRNA gene using the  $2^{-\Delta CT}$  calculation:  $\Delta CT = C_{T_{\text{gene of interest}}} - C_{T_{16S \text{ rRNA}}}$  ( $C_T$ , threshold cycle). Results are the mean of three replicates and error bars indicate standard deviation.

**a**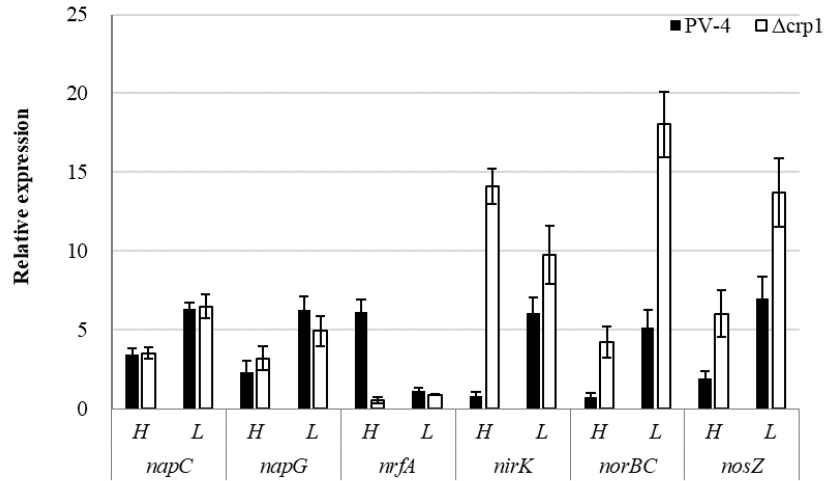**b**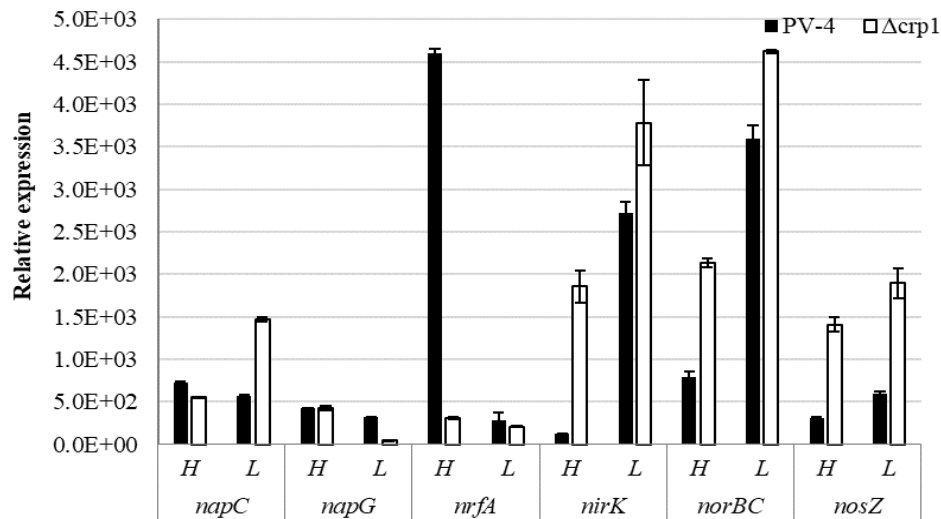

**Supplemental Figure S6.** The quantitative PCR analyses on transcriptional profile of nitrate reduction genes in the wild type strain *S. loihica* PV-4 and in-frame deletion mutant  $\Delta crp1$  under different carbon/nitrogen ratios at 14 hours after anaerobic cultivation. The tests were repeated twice (a and b). Gene expression was normalized against the 16S rRNA gene using the  $2^{-\Delta CT}$  calculation:  $\Delta CT = C_{T_{\text{gene of interest}}} - C_{T_{16S \text{ rRNA}}}$  ( $C_T$ , threshold cycle). H represents high carbon/nitrogen ratio, L represents low carbon/nitrogen ratio. Results are the mean of three replicates and error bars indicate standard deviation.





**a**

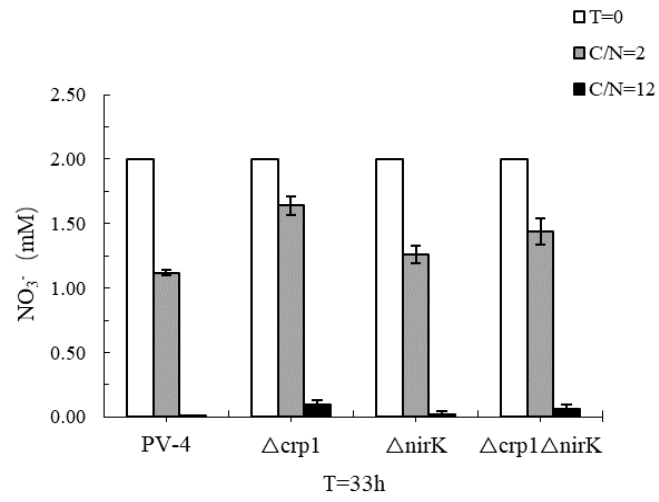

**b**

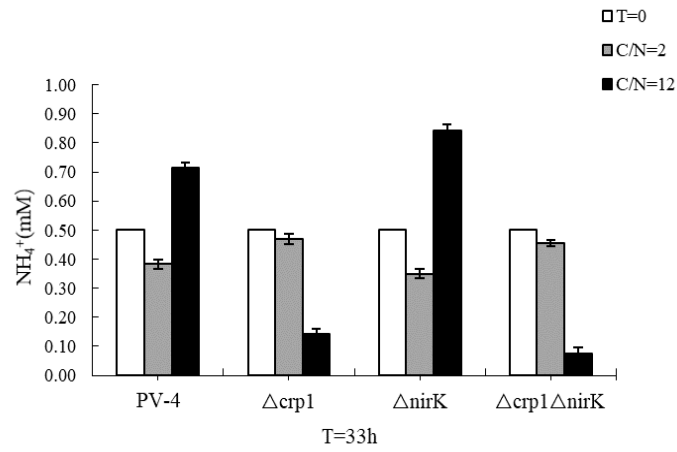

**c**

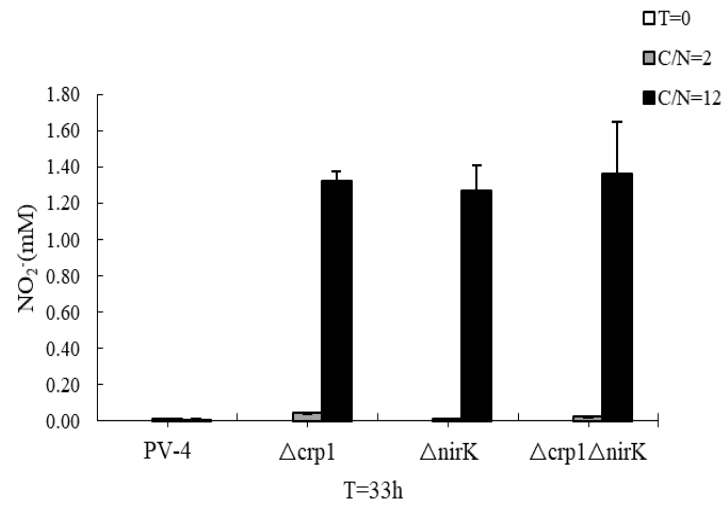

**Supplemental Figure S8.** The nitrate (a), ammonium (b) and nitrite (c) concentrations of the *S. loihica* PV-4, in-frame deletion mutants  $\Delta crp1$ ,  $\Delta nirK$ , and  $\Delta crp1\Delta nirK$  double mutant grown under different carbon/nitrogen ratios.

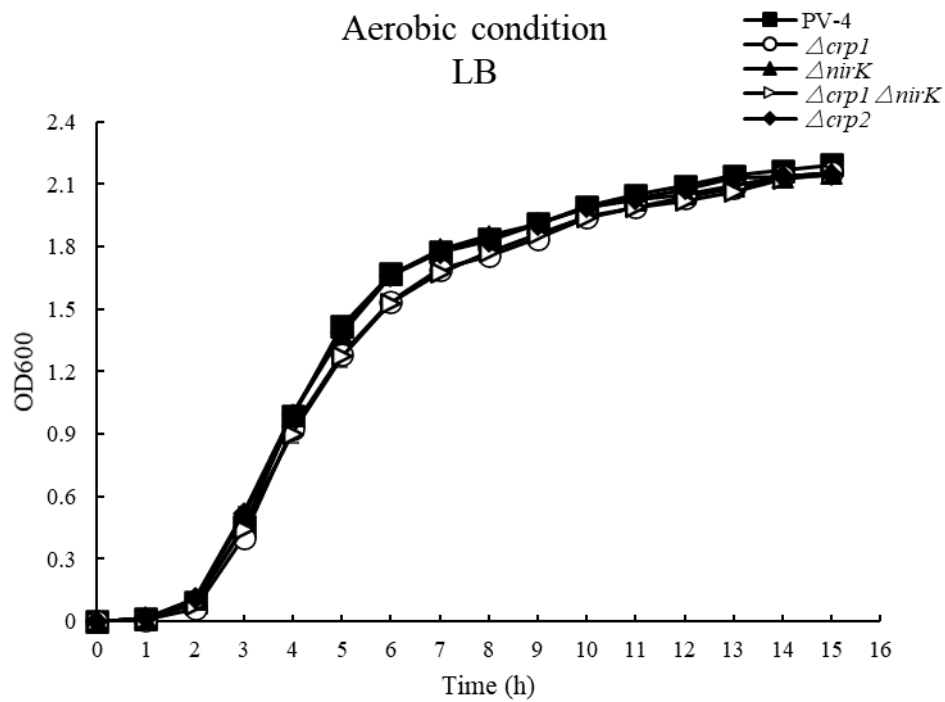

**Supplemental Figure S9.** Bacterial growth (optical density at 600 nm [OD<sub>600</sub>]) of the *S. loihica* PV-4, in-frame deletion mutants  $\Delta crp1$ ,  $\Delta crp2$ ,  $\Delta nirK$ , and  $\Delta crp1 \Delta nirK$  double mutant in the rich medium (LB broth) under aerobic condition.

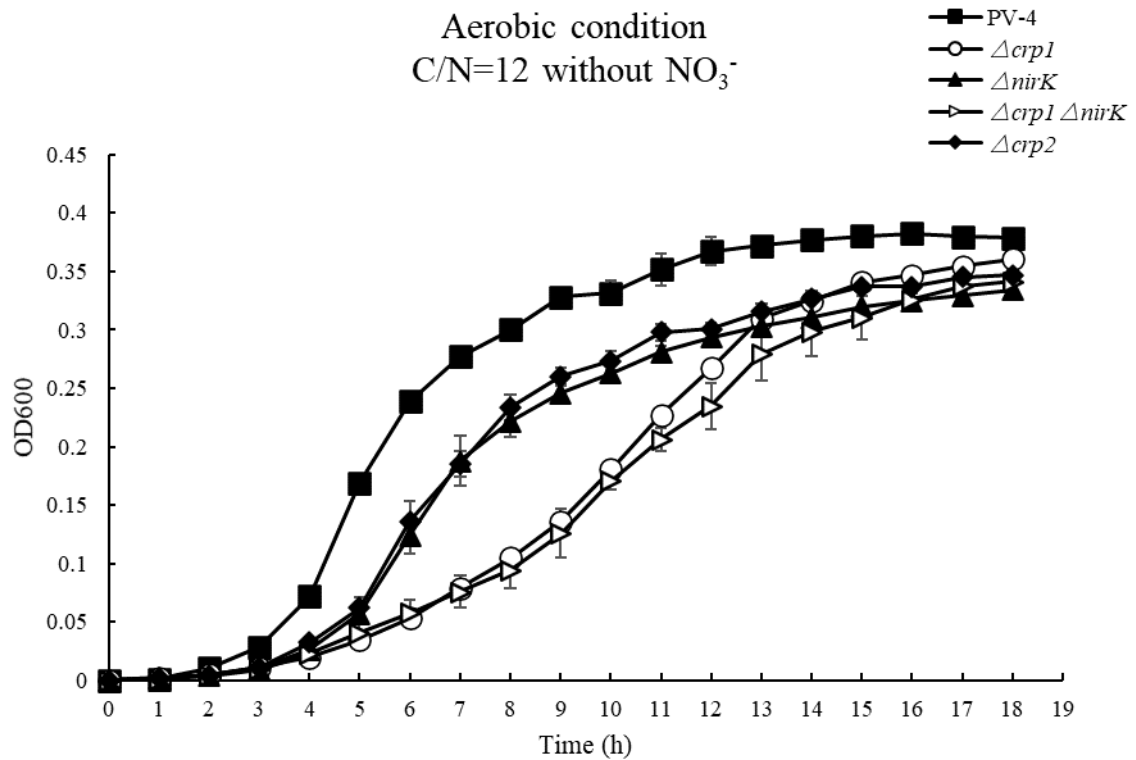

**Supplemental Figure S10.** Bacterial growth (optical density at 600 nm [OD<sub>600</sub>]) of the *S. loihica* PV-4, in-frame deletion mutants  $\Delta crp1$ ,  $\Delta crp2$ ,  $\Delta nirK$ , and  $\Delta crp1 \Delta nirK$  double mutant under aerobic condition and high carbon/nitrogen ratio. Lactate (10 mM) was added to phosphate-buffered basal salt medium supplemented with 0.5 mM of ammonium chloride as nitrogen source without nitrate.

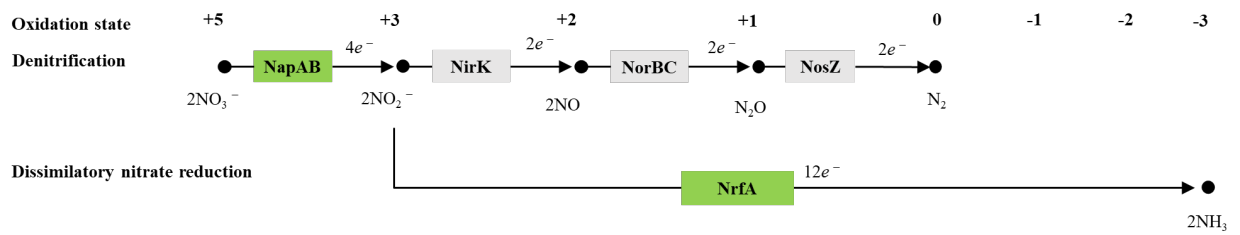

**Supplemental Figure S11.** Schematic diagram of electron transport and chemical valence change of the nitrate reduction (DNRA and denitrification) in *S. loihica* PV-4.

**a**

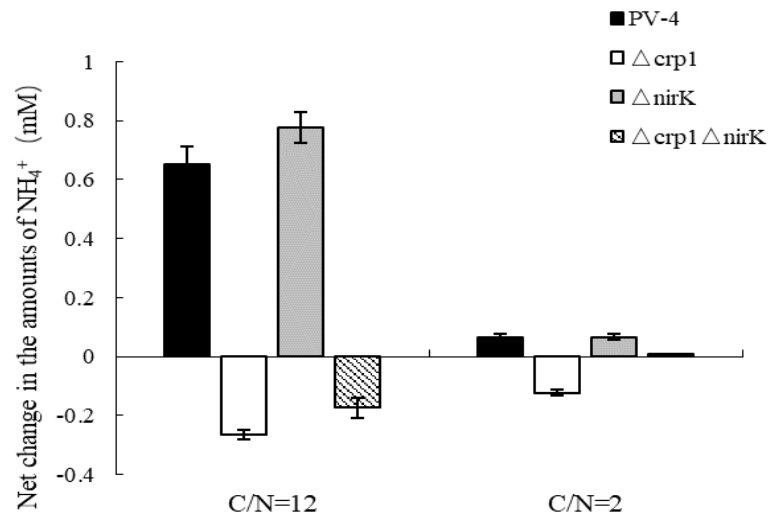

**b**

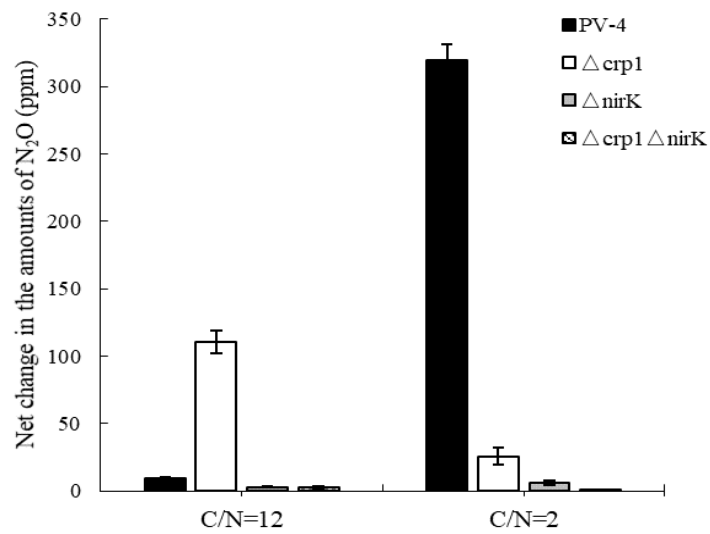

**Supplemental Figure S12.** Comparison of the degree change magnitude of ammonium (a) and nitric oxide (b) levels in the cultures of the wild type strain of *Shewanella loihica* PV-4, in-frame deletion mutants  $\Delta\text{crp1}$ ,  $\Delta\text{nirK}$ , and  $\Delta\text{crp1}\Delta\text{nirK}$  double mutant grown under different carbon/nitrogen ratios.

## References:

1. **Stewart V, Bledsoe PJ, Chen L-L, Cai A.** 2009. Catabolite repression control of napF (periplasmic nitrate reductase) operon expression in *Escherichia coli* K-12. *J Bacteriol* **191**:996-1005.
